1  
2 Efficacy of aerial forward-looking infrared surveys for detecting polar bear  
3 maternal dens  
4

5  
6 Tom S. Smith<sup>1\*</sup>, Steven C. Amstrup<sup>2¶</sup>, John Kirschhoffer<sup>2¶</sup>, Geoffrey York<sup>2¶</sup>  
7

8  
9 <sup>1</sup>Wildlife and Wildlands Conservation Program, Brigham Young University, Provo, Utah, United  
10 States of America

11 <sup>2</sup> Polar Bears International, Bozeman, Montana, United States of America  
12

13  
14  
15 \*Corresponding author

16 E-mail: [tom\\_smith@byu.edu](mailto:tom_smith@byu.edu)  
17

18 ¶ These authors contributed equally to this work.

## 19 **Abstract**

20           Denned polar bears are invisible under the snow, therefore winter-time petroleum  
21 exploration and development activities in northern Alaska have potential to disturb maternal  
22 polar bears and their cubs. Previous research determined forward looking infrared (FLIR)  
23 imagery could detect many polar bear maternal dens under the snow, but also identified  
24 limitations of FLIR imagery. We evaluated the efficacy of FLIR-surveys conducted by oil-field  
25 operators from 2004-2016. Aerial FLIR surveys detected 15 of 33 (45%) and missed 18 (55%)  
26 of the dens known to be within surveyed areas. While greater adherence to previously  
27 recommended protocols may improve FLIR detection rates, the physical characteristics of polar  
28 bear maternal dens, increasing frequencies of weather unsuitable for FLIR detections—caused by  
29 global warming, and competing “hot spots” are likely to prevent FLIR surveys from detecting  
30 maternal dens reliably enough to afford protections consonant with increasing global threats to  
31 polar bear welfare.

32

## 33 **Introduction**

34           Polar bears construct snow dens in which they give birth to and nurture altricial young. In  
35 arctic Alaska, dens in drifted snow are excavated from mid-October through early December.  
36 Cubs are born in midwinter (Amstrup 2003), and family groups abandon dens by mid-April  
37 (Amstrup 1993 and Smith et al. 2007).

38           The geographic scope of petroleum exploration and development in the Alaskan Beaufort  
39 Sea coastal region has been expanding, and is now even proposed for the Coastal Plain of the  
40 Arctic National Wildlife Refuge (<https://eplanning.blm.gov/epl-front->

41 office/eplanning/planAndProjectSite.do?methodName=dispatchToPatternPage&currentPageId=1  
42 52110) which is designated critical polar bear denning habitat. Simultaneously, the proportion of  
43 maternal polar bears choosing to den on land has been increasing (Amstrup and Gardner 1994,  
44 Fischbach et al. 2007). The likelihood that maternal dens could be disturbed therefore, can be  
45 expected to increase. Because polar bear cubs are born very altricial and cannot leave the shelter  
46 of the den until approximately 3 months of age (Amstrup 2003), disruption of denning can have  
47 negative consequences for cubs and maternal females (Amstrup 1993, Linnell et al. 2000).  
48 Additionally, industry-related den disturbance can have significant economic consequences,  
49 including: rerouting roads, delays in exploration and production, fines, and other penalties.

50         Maternal dens usually remain unopened through winter and are essentially invisible  
51 under the snow. Previous research determined forward looking infrared (FLIR) imagery could  
52 detect the temperature differential between snow over some polar bear maternal dens and the  
53 snow where dens were absent. That research, however, also identified limitations of FLIR  
54 imagery, and recommended “best practices” protocols to maximize detection abilities (Amstrup  
55 et al. 2004, York et al. 2004, Robinson et al. 2014). To detect and hence avoid disturbances to  
56 maternal dens, oil companies operating in southern Beaufort Sea coastal areas of northern Alaska  
57 began using FLIR in 2004 to locate polar bear dens within oil-field operating areas so they can  
58 be avoided during ice road construction and other exploration and production activities.

59         The purpose of this study was to evaluate the efficacy of industry-operated aerial FLIR  
60 surveys (hereafter referred to as “industry AFS”) and make recommendations for future den  
61 detection and avoidance efforts.

62

63

## 64 **Study Area**

65           The study area included northern Alaska's Beaufort Sea coastal areas (commonly called  
66 the North Slope), extending 133 km west and 91 km east of Prudhoe Bay (70°20' N, 148°24' W,  
67 Figure 1). The Prudhoe Bay region has a semi-arid-tundra climate. The mean annual  
68 temperature at Deadhorse, an unincorporated community providing airport services, weather  
69 observations and an unofficial hub for Prudhoe Bay operations, is -11 °C (12 °F). The warmest  
70 month, July, has a daily average temperature of 8.3 °C (47 °F), the coldest month February at -28  
71 °C (-18 °F; Deadhorse 2019).

72 **Fig. 1. Study area where FLIR aerial surveys and ground truthing of polar bear den**  
73 **detection surveys were conducted in northern Alaska, 2004-2016.**

74           Alaska's North Slope lacks the steep topography associated with other denning areas  
75 such as Wrangel and Herald Islands, Russia (Uspenski and Kistchinski, 1972, Ovsyanikov,  
76 1998), and Svalbard, Norway (Larsen, 1985). The predominantly flat topography of coastal  
77 arctic Alaska means suitable denning habitat is restricted to riverbanks, coastal bluffs, barrier  
78 islands and other areas where relief is sufficient to catch drifting snow (Amstrup 1993, Amstrup  
79 and Gardner 1994, Durner et al. 2001, Durner et al. 2003, Durner et al. 2006). Amstrup (2003)  
80 reported over 80% of dens, located by radio telemetry along Alaska's north slope, were within  
81 10km of shore, but a small number have been located as far inland as 50 km (Durner et al.,  
82 2003).

83

## 84 **Methods**

85           We assessed the efficacy of industry AFS for polar bear den site detection by comparing  
86 industry AFS results, for the period 2004-2016, with ground-truth data we collected during  
87 research we conducted on emergence behaviors of denning polar bears between 2002 and 2016  
88 in the same area (Smith et al. 2007, Smith et al. 2013). Our on the ground documentation of  
89 actual den sites provided ground truth data against which industry AFS results were compared  
90 for this report.

91           Industry AFS were conducted with the Star Safire (models II, III, and HD 380 FLIR  
92 camera units ([www.flir.com](http://www.flir.com))). FLIR units employed were gimbal-mounted (single axis rotational  
93 support) under a de Havilland DHC-6 Twin Otter for all surveys referenced here. This mounting  
94 system allowed the FLIR imager to be directed independent of altitude and in any direction  
95 below the horizontal plane of the aircraft. The Safire, operates in the 8 to 14 micron wavelength  
96 range, and under ideal circumstances can detect temperature differences as small as 0.1°C (FLIR  
97 Systems). Here we refer to thermal signatures detected by industry AFS as “hot spots.” When a  
98 hot spot was detected, observers changed FLIR camera view angle, aircraft altitude and position  
99 in an attempt to determine whether it was a den or some other source of heat. Numerous  
100 potential targets in this environment (e.g. cracks in sea ice, exposed soil, large rocks, or some  
101 manmade objects like abandoned 55-gallon steel drums) collect and reradiate heat differently  
102 than snow covered ground, and can emit thermal signals similar to those from dens (Figure 2).  
103 Hotspots with the “right” signature, detected during surveys, were marked as putative maternal  
104 dens. FLIR generated video, including observer audio comments about detected hotspots, was  
105 recorded for each flight and archived. Surveyors recorded weather conditions, reported by the  
106 flight service station in Deadhorse, during each survey. To supplement weather data recorded  
107 during industry AFS, we collected data from the closest ground-based weather stations to each

108 survey flight. These data included ambient temperature, wind speed, relative humidity, and dew  
109 point. Dew point, the temperature to which a given parcel of air must be cooled for saturation to  
110 occur, incorporates the effect of pressure and temperature on relative humidity.

111 **Fig. 2. Forward-looking infrared image of two polar bear dens in the snow bank on the**  
112 **south shore of an Alaskan coastal island. Also note hotspots created by exposed tundra and**  
113 **warmth radiating up from sea ice with a thin covering of snow.**

114 Personal involved in industry AFS provided us with complete survey reports for the years  
115 2008-2016. Those reports provide dates, times, prevailing weather conditions, number of  
116 putative dens recorded, and areas in which no dens were observed. Prior to 2008, we received  
117 only putative den locations and observations of other polar bear signs.

118 Along with putative den locations from industry AFS, we used a hand-held FLIR imager  
119 (ThermaCAM P65 HS, FLIR Systems) with a 72mm infrared telephoto lens to identify potential den  
120 sites by visiting historically high-use denning areas by snowmachine and scanning snowbanks with  
121 the hand-held unit. Additionally, den locations of radio-collared polar bears were provided by the  
122 U.S. Geological Survey (USGS) and by the US Fish and Wildlife Service (FWS) that had been  
123 confirmed by visual observation or the use of Karelian Bear Dogs. We monitored putative den  
124 locations provided by industry AFS, to ascertain which ones were correctly identified as  
125 maternal dens. In addition to positive FLIR identifications of den sites, we tabulated the number  
126 of dens known to be within surveyed areas that were missed by industry AFS (false negatives),  
127 and we evaluated the frequency of hotspots that were incorrectly identified as dens but proved  
128 otherwise (false positives). After bears left their dens in spring, we visited each confirmed den  
129 site and recorded the depth of snow overlying the main chamber, and other site characteristics  
130 (consistent with Durner et al. 2003).

## 131 **Results**

132           Once den breakout began in the study area (mean date = 16 March, range = 1 March to 4  
133 April; Figure 3), den locations could be verified visually because piles of excavated snow and  
134 tracks and other signs of bear activity surrounding den openings were visible on the snow  
135 surface. Consequently, we believe our thorough ground assessment of the survey area provided  
136 an accurate evaluation of industry AFS results.

137 **Fig. 3. Emergence dates for 32 polar bear dens within the study area from 2002-2014.**

138 **Emergence time for one den discovered during this study was not accurately known.**

139           Between 2004 and 2016, we identified 33 maternal polar bear dens within areas also  
140 surveyed by industry. Of those 33 dens, 15 (45%) were accurately detected by industry AFS  
141 (Table 1). Industry AFS operators also identified 19 putative polar bear dens that our field work  
142 proved to be thermal signatures generated by other sources. Because aerial inspection of these  
143 “false positives,” during industry AFS, proved insufficient to differentiate them from real dens,  
144 monitoring and activity restrictions required for maternal dens also were required for these  
145 locations. Prevailing weather at the time of each AFS is presented in Table 2. No industry AFS  
146 den surveys were conducted when the sun was above the horizon.

147 **Table 1. Summary of observations collected during aerial FLIR surveys to detect polar bear dens in northern Alaska, 2004 to**  
 148 **2016.**

| Survey Year            | False Positives <sup>1</sup> | False Negatives <sup>2</sup> | Positives <sup>3</sup> | Total Dens in Survey Area <sup>4</sup> |
|------------------------|------------------------------|------------------------------|------------------------|----------------------------------------|
| 2004                   | 3                            | 1                            | 0                      | 1                                      |
| 2005                   | 0                            | 6                            | 1                      | 7                                      |
| 2007                   | 3                            | 1                            | 3                      | 4                                      |
| 2008                   | 2                            | 4                            | 2                      | 6                                      |
| 2009                   | 3                            | 2                            | 4                      | 6                                      |
| 2010                   | 0                            | 1                            | 0                      | 1                                      |
| 2011                   | 2                            | 0                            | 2                      | 2                                      |
| 2012                   | 4                            | 0                            | 0                      | 0                                      |
| 2013                   | 0                            | 1                            | 0                      | 1                                      |
| 2014                   | 1                            | 1                            | 0                      | 1                                      |
| 2015                   | 0                            | 0                            | 2                      | 2                                      |
| 2016                   | 1                            | 1                            | 1                      | 2                                      |
| Total dens (% total)   |                              | 18 (55%)                     | 15 (45%)               | 33                                     |
| In AFS surveyed area   |                              |                              |                        |                                        |
| Total AFS Observations |                              | 19 (36%)                     | 18 (35%)               | 15 (29%)                               |

<sup>1</sup> All hotspots that were thought to be dens but proved otherwise.

<sup>2</sup> Areas cleared by AFS as not having bear dens present but researcher surveys later proved that they had them.

<sup>3</sup> All hotspots that were thought to be dens and were proven correct.

<sup>4</sup> As determined by researchers on snowmachines who surveyed areas frequently and used cameras to document presence/absence of bears.



149 **Table 2. Prevailing weather conditions during FLIR aerial survey flights for polar bear den detection, northern Alaska,**  
 150 **2007—2016. We were not provided weather data for surveys conducted prior to 2007.**

| Survey Date | Temperature<br>(°C) | Dew point/temp spread<br>(°C) | Wind Speed<br>(km/h) | Misidentified<br>Den Sites |
|-------------|---------------------|-------------------------------|----------------------|----------------------------|
| 4 Dec 2007  | -15                 | 5                             | 9.7                  | 3                          |
| 29 Jan 2008 | -24                 | 19                            | 29.0                 | 3                          |
| 8 Dec 2008  | -22                 | no data                       | 33.8                 | 3                          |
| 7 Dec 2009  | -8                  | 12                            | 0.2                  | 5                          |
| 17 Dec 2011 | -24                 | 3                             | 32.2                 | 2                          |
| 6 Jan 2012  | -27                 | 3                             | 16.1                 | 4                          |
| 14 Dec 2012 | -38                 | no data                       | 9.7                  | 1                          |
| 9 Dec 2013  | -15                 | 2                             | 48.3                 | 3                          |
| 3 Dec 2014  | -11                 | 7                             | 3.2                  | 1                          |
| 4 Dec 2014  | -6                  | 7                             | 6.4                  | 1                          |
| 5 Dec 2014  | 3                   | 5                             | 16.1                 | 1                          |
| 6 Dec 2014  | -8                  | 5                             | 25.7                 | 2                          |
| 4 Dec 2015  | -28                 | 3                             | 16.1                 | 2                          |
|             | $\bar{x} = -17$     | $\bar{x} = 6.5$               | $\bar{x} = 19.0$     | Total = 31                 |

151

## 152 **Discussion**

153           During 13 years of industry AFS only 15 of 33 (45% detection rate) polar bear dens  
154 known to be within the areas surveyed were detected. One possible explanation for failure of  
155 industry AFS to detect dens is that some female bears could have entered dens late in the  
156 season—after the AFS was conducted. However, Amstrup and Gardner (1994) reported  
157 November 11 was the mean den entrance date for polar bears denning successfully on land.  
158 Rode et al. (2018), also reported a November 11 mean den entrance date for the polar bears in  
159 northern Alaska with a  $\pm$  SD of 18.5 days. While it is possible for bears to have entered dens  
160 after survey dates presented in Table 2, nearly 95% of all bears were denned before 4  
161 December (USGS 2018)—the earliest recorded industry AFS effort. Hence ambient  
162 conditions and other limitations of FLIR are more likely drivers of the low detection rate of  
163 industry AFS.

164           In order to test den detection effectiveness of AFS, Amstrup et al. (2004) flew multiple  
165 FLIR surveys over 23 denning bears for which exact locations were known by radio-  
166 telemetry. Only 7 of the 23 dens (30%) were detected on every flight, and 4 dens (17%) were  
167 never detected. Weather conditions (e.g., wind, precipitation, temperature-dew point spread)  
168 and conducting surveys in daylight or too soon after snow fall or drifting caused by high wind,  
169 were identified as principal reasons for detection failure. Robinson et al. (2014) recommended  
170 against conducting surveys during daylight hours and Amstrup et al. (2004) concluded the  
171 probability of detecting dens in sunlight was essentially zero. Robinson et al. (2014) also  
172 reported that when wind was  $> 10$  km/h den detection with FLIR was unlikely. Of the  
173 industry AFS listed in Table 2, 42% (5 of 12) were conducted with winds  $< 10$  km/h.  
174 However, of those five surveys, two were conducted with prevailing winds very close to the

175 detectability cutoff (9.7 km/h). Hence, only 25% ( $n = 3$ ) of industry AFS, for which we have  
176 data on ambient conditions, were performed under wind conditions that were conducive to  
177 den detection with FLIR.

178         Although ambient conditions at the time of surveys appear to explain much of the  
179 detection failure rate; the 4 dens Amstrup et al. (2004) never detected were visited 6 times,  
180 including FLIR surveys conducted under optimal weather conditions. Variable snow depth  
181 over maternal dens may explain detection failures occurring even when survey conditions  
182 seem appropriate. Robinson et al. (2014) reported that even under ideal ambient conditions,  
183 hand-held FLIR was unable to detect a thermal signature emanating from artificial test dens if  
184 roof thickness was 90 cm or greater. While the actual roof thickness that precludes detection  
185 by industry AFS is uncertain, it is clear there is a snow depth threshold that prevents sufficient  
186 heat generated by dened bears from reaching the snow surface. Durner et al. (2003) reported  
187 the mean den roof thicknesses for 22 polar bear dens in northern Alaska was  $72 \pm 87$  cm, and  
188 ranged from as little as 10cm to as much as 400 cm. Snow depth over many dens, therefore,  
189 is likely near or above FLIR detection capabilities, regardless of weather—corroborating the  
190 conclusion of Amstrup et al. (2004) that some dens will never be detected with FLIR.

191         Mid-winter den abandonment may account for some putative den locations that we  
192 found not to be actual dens. More hotspots not associated with den emergence (36% of all  
193 putative den sites, Table 1), were reported by industry AFS than the actual number of dens  
194 detected. This far exceeds documented mid-winter den abandonments (mean = 12 % across  
195 all years, USGS 2018). York et al. (2004) advised that hotspots of interest should be  
196 revisited on subsequent days under good environmental conditions to confirm whether they  
197 are truly dens.. The rate of these “false positive” signals far exceeds anything that could be

198 expected because of mid-winter den abandonment, suggesting industry AFS did not adhere to  
199 protocols known to minimize false positives.

200

## 201 **Conclusions**

202 The U.S. Fish and Wildlife Service Conservation Management Plan (U.S. Fish and  
203 Wildlife 2016) recognizes the need for “on the ground” protections to assure as many polar  
204 bears as possible persist until sea ice is stabilized. The catastrophic decline (~40% between  
205 2000 and 2010) in the Southern Beaufort Sea polar bear population was driven by reduced  
206 survival, particularly of cubs (Bromaghin et al. 2015). This makes it clear that maximizing  
207 cub survival potential is essential to maximizing opportunity for polar bears in this region to  
208 persist. A critical step toward maximizing cub survival is protecting maternal dens. Where  
209 denning activity overlaps with intensive human activities like oil and gas development,  
210 protection of maternal dens begins with knowing where they are. By that measure, industry  
211 AFS has fallen short of the protections the imperiled southern Beaufort Sea population of  
212 polar bears requires.

213 The poor den detection rate of industry AFS is likely due to a combination of factors,  
214 including weather-related variables (e.g., wind, temperature-dew point spread, precipitation,  
215 etc.), time of day, and den roof thickness (Table 2). The latest generation of FLIR imagers,  
216 while more advanced and sensitive than those used in the earlier surveys, will still struggle  
217 with the fundamental physics of detecting subsurface heating associated with dens in the  
218 presence of strong winds, direct solar radiation, falling or blowing snow, or too deep snow  
219 overlaying the den (R. Overstreet, FLIR Sales Engineer, personal communications, 21  
220 February 2019). Available data make it clear that FLIR will never assure that all maternal

221 dens can be located and hence protected. In addition, as the Arctic has warmed airborne  
222 moisture has increased and is expected to continue to do so (Serreze et al. 2012). Because  
223 airborne moisture significantly limits FLIR detection capabilities, finding optimal operational  
224 windows for FLIR surveys, is likely to become increasingly difficult, and probabilities of den  
225 detection by FLIR are likely only to decline. Because global temperature rise ultimately will  
226 impact all polar bears, and because FLIR is unlikely to offer necessary protections, developing  
227 other technologies to protect maternal denning bears is of utmost importance.

228 To maximize detection rate in the near term, industry AFS should consistently follow  
229 recommended survey protocols developed during previous research (Amstrup et al. 2004,  
230 York et al. 2004, Robinson et al. 2014). Surveys should be done 1) with the sun below the  
231 horizon, 2) with a temperature-dew point spread  $> 2.8$  °C, 3) with winds  $< 10$  km/h, 4)  
232 without precipitation, 5) not immediately after a strong wind event, 6) with helicopters rather  
233 than fixed-wing aircraft, 7) and with multiple flights to eliminate hotspots that are not dens.  
234 Also, to the maximum extent possible, industry should continue to conduct AFS in early  
235 winter (i.e., early December), when snow accumulation over dens is likely to be at winter  
236 minimums. While best FLIR practices are applied in the near term, we encourage the  
237 exploration of other technologies that could increase our ability to detect polar bear dens.  
238 Synthetic aperture radar (SAR) has shown promise for detecting dens, and is not vulnerable to  
239 the weather and daylight constraints that limit FLIR application. Significant testing, however,  
240 is required to properly evaluate the promise of SAR. Regardless of whether SAR surveys are  
241 the answer, the current and future threats to polar bears mandate development of new den  
242 location technologies with higher detection rates than possible with FLIR.

243

244

## 245 **Acknowledgements**

246           We would like to thank anonymous reviewers for their thoughtful comments regarding  
247 this manuscript. We would also like to thank the following persons for assisting data  
248 collection: S. Partridge, J. Wilder, T. D. DeBruyn, J. Wilder, T. Evans, S. Schliebe, C.  
249 Perham, R. Shideler, B. Jessop, J. Olson, R. Robinson, W. G. Larson and J. Whiting.  
250 Additionally, we thank W. J. Streever, D. Sanzone, and C. Pohl of British Petroleum  
251 Exploration (BPX) for their support and assistance, without which this work would not have  
252 been possible. Also important was R. Murray and N. Hermon of Alaska Clean Seas, and S.  
253 Gogosha and D. Heebner of HilCorp Energy Company who provided invaluable assistance at  
254 the Milne Point facility. We extend special thanks to D. Herron and J. Thompson of the BP  
255 Thermographics Division for providing access to the FLIR cameras. Polar Bears International  
256 (PBI) has played a critical role in supporting this work. Funding for this work was provided,  
257 in part by the U.S. Fish and Wildlife Service, the U.S. Geological Survey, BPX, PBI and  
258 BYU.

259

## 260 **References**

- 261 1. Amstrup, S.C. Human disturbances of denning polar bears in Alaska. *Arctic* 1993; 46:  
262 246-250.
- 263 2. Amstrup, S.C., and Gardner, C. Polar bear maternity denning in the Beaufort Sea. *J.*  
264 *Wildl. Manage.* 1994; 58: 1-10.
- 265 3. Amstrup, S. C. The polar bear, *Ursus maritimus*. Chapter 27 in *Wild Mammals of*  
266 *North America: biology, management, and conservation*. Edited by G.A. Feldhamer,

- 267 B.C. Thompson, and J.A. Chapman. John Hopkins Univ. Press, Baltimore. 2003; pp.  
268 587-610.
- 269 4. Amstrup, S. C., G. York, T. L. McDonald, R. Nielson, and K. Simac. Detecting  
270 denning polar bears with forward looking infra-red (FLIR) imagery. *BioSci.* 2004; 54:  
271 337-344.
- 272 5. Bromaghin, J.F., T.L. McDonald, I. Stirling, A. E. Derocher, E.S. Richardson, E.V.  
273 Regehr, D. C. Douglas, G.M. Durner, T. Atwood, and S.C. Amstrup. Polar bear  
274 population dynamics in the Southern Beaufort Sea during a period of sea ice decline.  
275 *Eco. Appl.* 2015; 25: 634–651.
- 276 6. Deadhorse, Alaska. Wikipedia. Wikimedia Foundation. Available from:  
277 [https://en.wikipedia.org/wiki/Deadhorse,\\_Alaska](https://en.wikipedia.org/wiki/Deadhorse,_Alaska).
- 278 7. Durner, G. M., S. C. Amstrup, and K. J. Ambrosius. Remote identification of polar  
279 bear maternal den habitat in northern Alaska. *Arctic* 2001; 54:115-121.
- 280 8. Durner, G.M., S. C. Amstrup, and A. S. Fischbach. Habitat characteristics of polar  
281 bear terrestrial maternal den sites in northern Alaska. *Arctic* 2003; 56:55-62.
- 282 9. Durner, G.M., S. C. Amstrup, and K. J. Ambrosius. Polar bear maternal den habitat in  
283 the Arctic National Wildlife Refuge, Alaska. *Arctic* 2006; 59: 31-36.
- 284 10. Fischbach, A. S., S. C. Amstrup, and D. C. Douglas. Landward and eastward shift of  
285 Alaskan polar bear denning associated with recent sea ice changes. *Polar Bio.* 2007;  
286 30:1395-1405.
- 287 11. Hansson, R., and Thomassen, J. Behavior of polar bears with cubs in the denning area.  
288 *Int. Conf. on Bear Res. and Manage.* 1983; 5:246-254.
- 289 12. Larsen, T. Polar bear denning and cub production in Svalbard, Norway. *J. Wildl.*

- 290 Manage. 1985; 49:320-326.
- 291 13. Linnell, J.D.C., J. E. Swenson, R. Andersen, and B. Barnes. How vulnerable are  
292 denning bears to disturbance? Wildl. Soc. Bull. 2000; 28:400-413.
- 293 14. Ovsyanikov, N. Den use and social interactions of polar bears during spring in a dense  
294 denning area on Herald Island, Russia. Int. Conf. Bear Res.Manage. 1998; 10: 251-  
295 258.
- 296 15. Robinson, R., T. S. Smith, R. T. Larsen and B. J. Kirschhoffer. Factors influencing  
297 polar bear den detection using forward-looking infrared imagery. BioSci. 2014; 64:  
298 735-742.
- 299 16. Rode, K. D., J. W. Olson, D. Eggett, D. C. Douglas, G. M. Durner, T. C. Atwood, E.  
300 V. Regher, R. S. Wilson, T. S. Smith, M. St. Martin. Den phenology and reproductive  
301 success of polar bears in a changing climate. J. Mamm. 2018; 99:16-26.
- 302 17. Serreze M. C., A. P. Barrett, and J. Stroeve. Recent changes in tropospheric water  
303 vapor over the Arctic as assessed from radiosondes and atmospheric reanalyses. J.  
304 Geophys. Res. 1998; 117, D10104, doi:10.1029/2011JD017421.
- 305 18. Smith, T. S., S. T. Partridge, S.C. Amstrup, and S. Schliebe. Post-den emergence  
306 behavior of polar bears (*Ursus maritimus*) in Northern Alaska. Arctic 2007; 60: 187-  
307 194.
- 308 19. Smith, T. S., J. A. Miller and C. S. Layton. A comparison of methods to document  
309 activity patterns of post-emergence polar bears (*Ursus maritimus*) in northern Alaska.  
310 Arctic 2013; 66: 139-146.
- 311 20. U.S. Fish and Wildlife. Polar Bear (*Ursus maritimus*) Conservation Management Plan,  
312 Final. 2016. U.S. Fish and Wildlife, Region 7, Anchorage, Alaska. 104 pp.



- 313 21. USGS Alaska Science Center, Polar Bear Research Program. Denning phenology, den  
314 substrate, and reproductive success of female polar bears (*Ursus maritimus*) in the  
315 Southern Beaufort Sea 1986-2013 and the Chukchi Sea 1987-1994: U.S. Geological  
316 Survey data release, <https://doi.org/10.5066/F7DF6PC9>.
- 317 22. Uspenski, S.M., and Kistchinski, A.A. New data on the winter ecology of the polar  
318 bear (*Ursus maritimus*) on Wrangel Island. International Conference on Bear  
319 Research and Management 1972; 2: 181-197.
- 320 23. York, G., S. C. Amstrup, and K. Simac. Using forward looking infrared (FLIR)  
321 imagery to detect polar bear maternal dens: operations manual. USGS Report  
322 submitted to USDOJ-MMS, 2004; 58 pp.

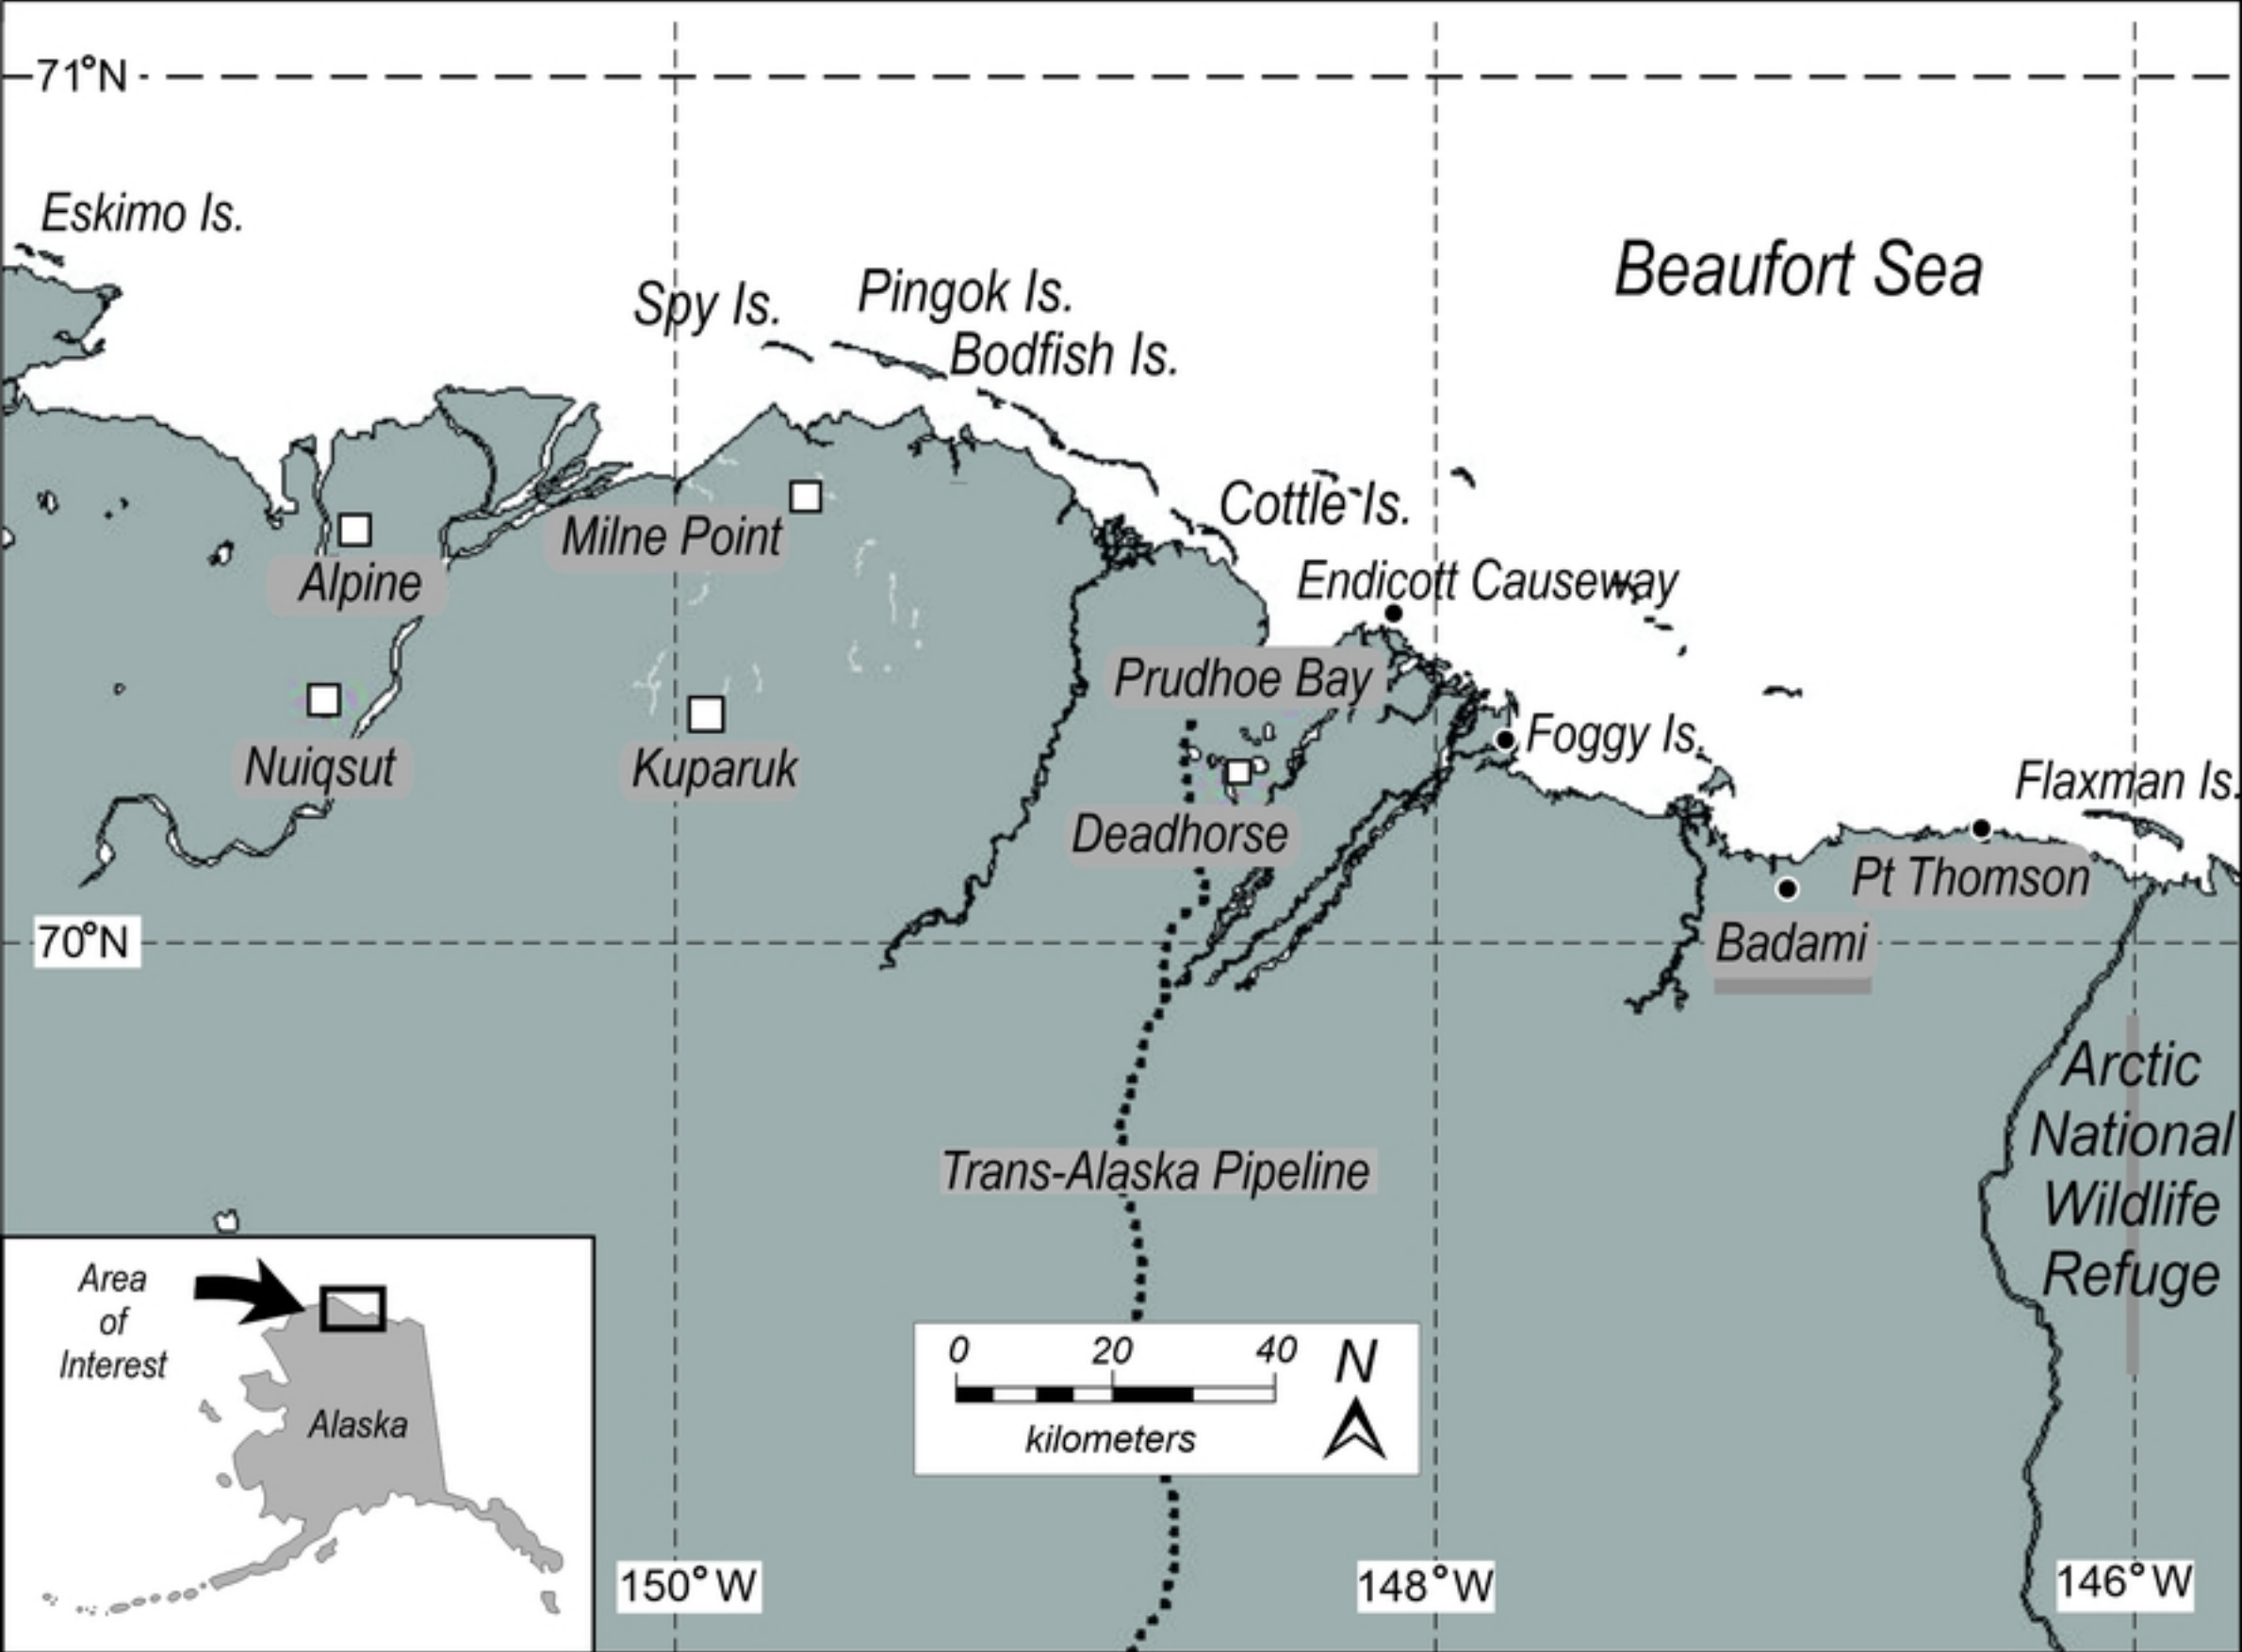

Figure 1

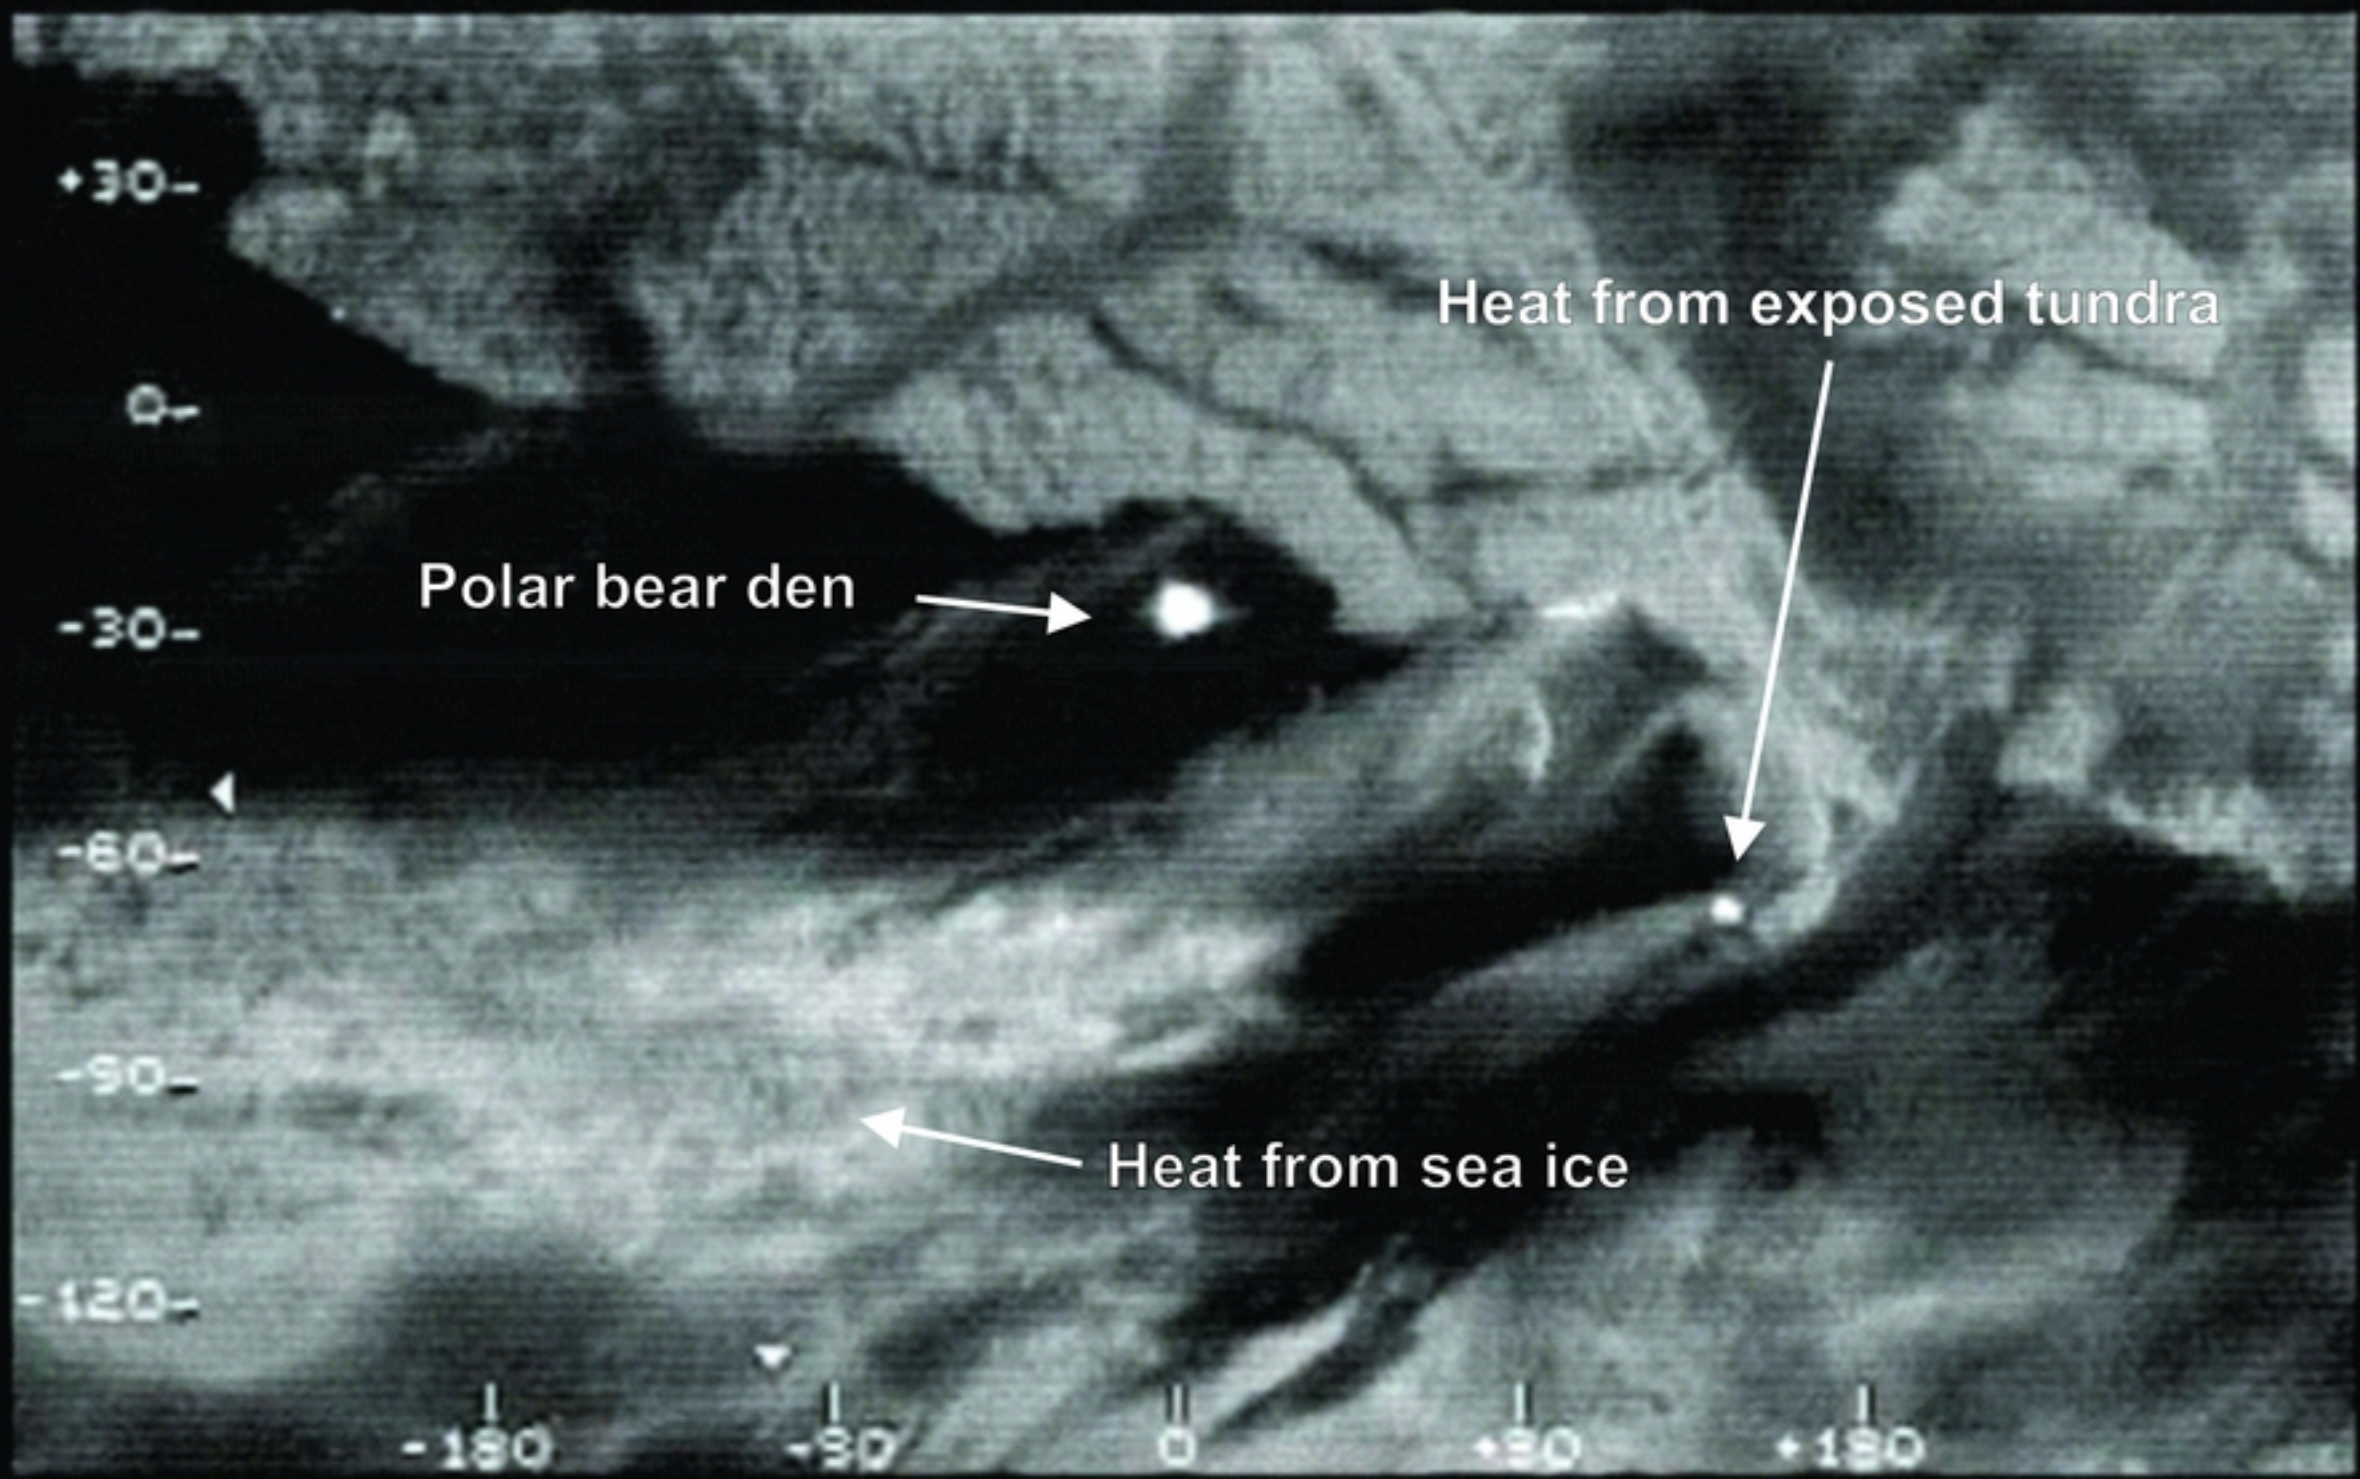

Figure 2

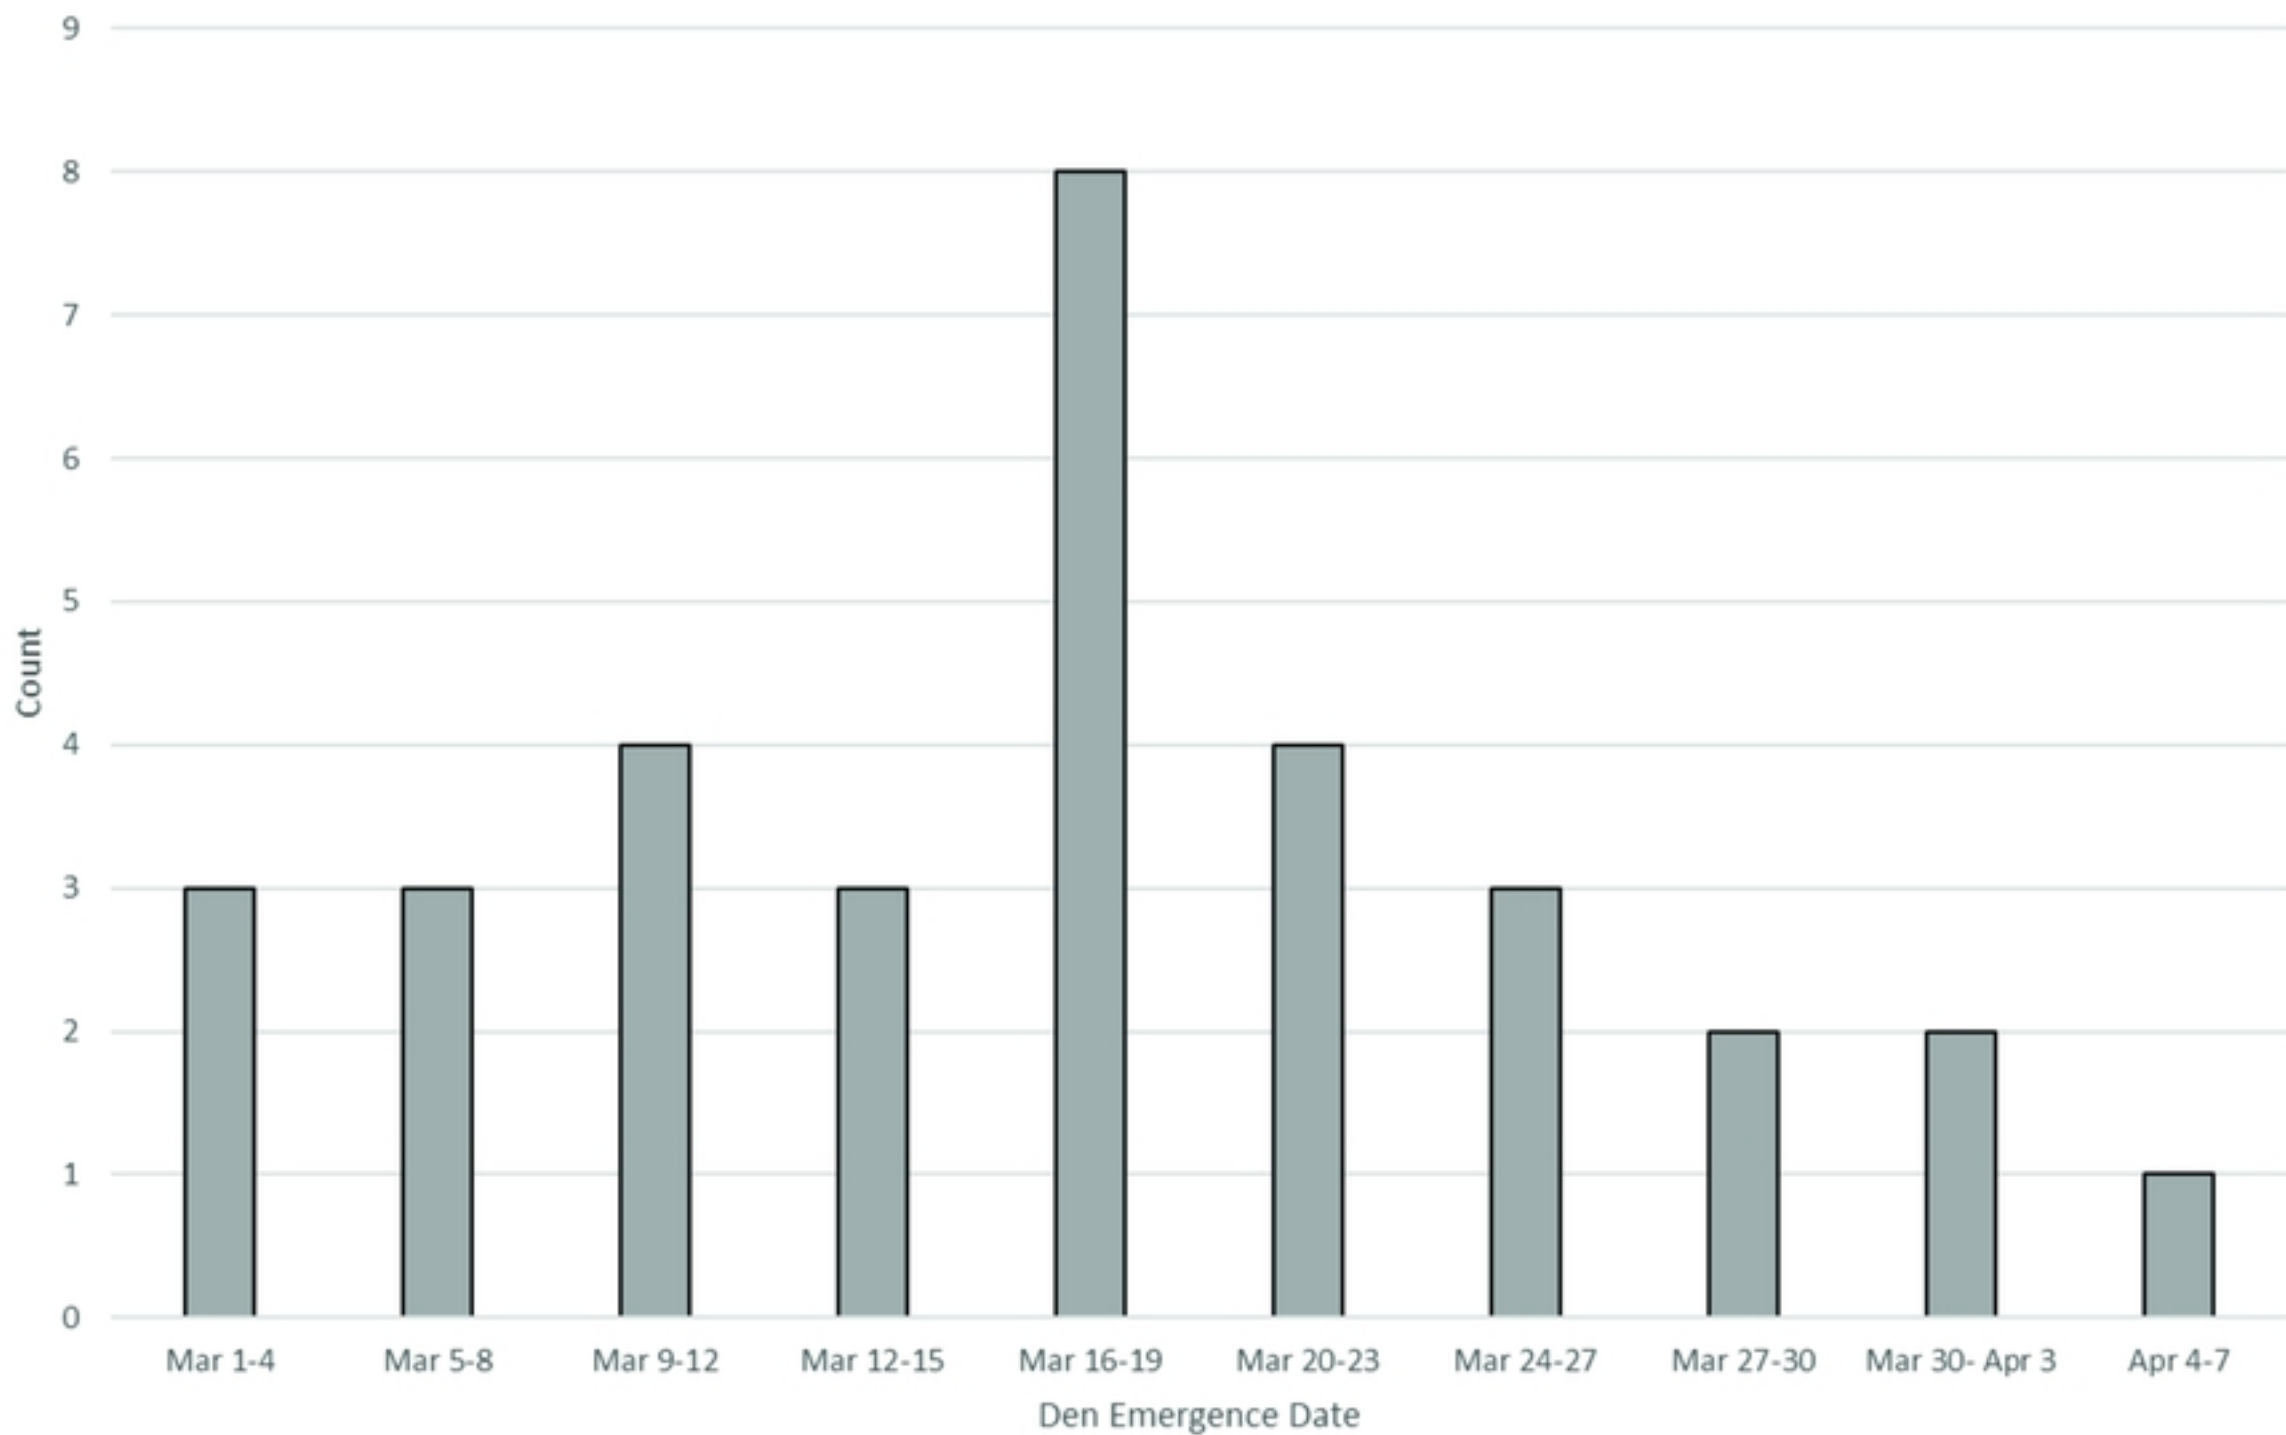

Figure 3
